# Supplementary material
Source: PubMed Central journal article supplement (PMC514509)
Supplement: 7600335s1.pdf [file 7600335s1.pdf]

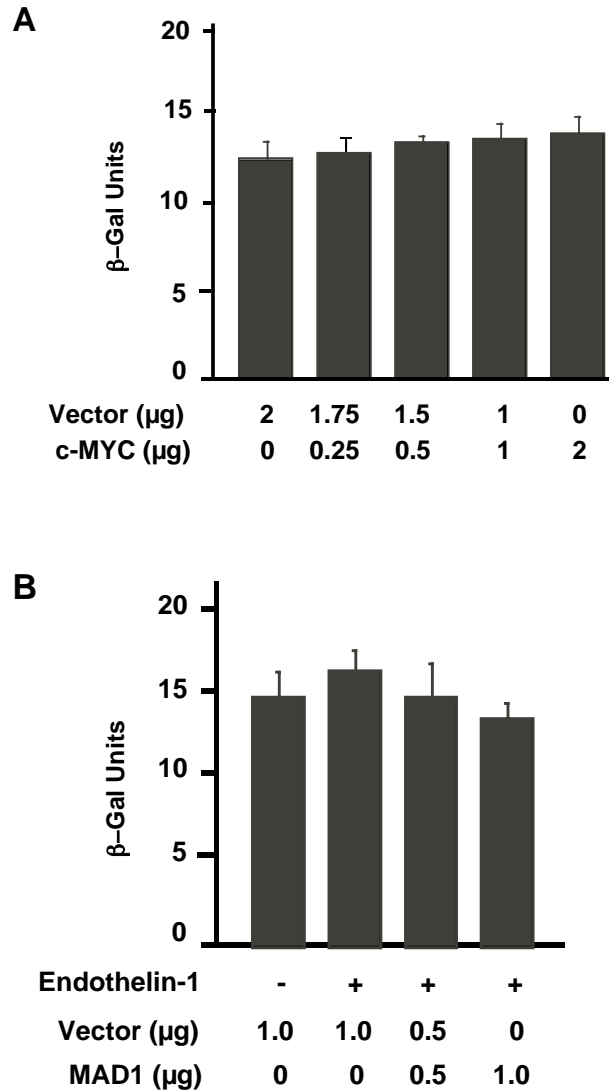

**Supplemental Figure 1:** c-MYC and MAD1 do not alter general transcription or translation in primary neonatal cardiomyocytes as determined by expression of a control reporter gene.

**(A):** Non-hypertrophic cultures of primary cardiomyocytes were transfected with pCMV- $\beta$ -Gal, pSMECAT (see Fig 3D) and an increasing amount of a c-MYC expression vector. After 24 h, cells were harvested and assayed for  $\beta$ -Gal activity (n=5). **(B):** Cultures of primary neonatal cardiomyocytes were transfected with pCMV- $\beta$ -Gal, pSMECAT (see Fig 3E) and an increasing amount of a MAD1 expression vector prior to stimulation with the hypertrophic agent endothelin-1. After 24 h, cells were harvested and assayed for  $\beta$ -Gal activity (n=5).
