# Supplementary material
Source: PubMed Central journal article supplement (PMC514509)
Supplement: 7600335s2.pdf [file 7600335s2.pdf]

Poortinga et al, Suppl  
Fig 2

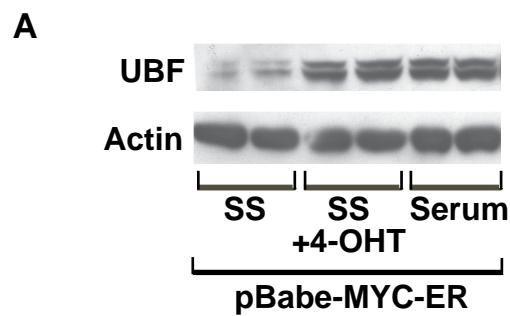

**Supplemental Figure 2:** Mitogenic stimulation of serum starved fibroblasts leads to similar levels of UBF protein induction as does c-MYC activation.

(A): pBabe-MYC-ER NIH3T3 cells were serum starved for 24 h before either MYC-ER was activated with 4OHT for 24 h or cells were re-fed with media containing 10% serum for 24h. Cells were then harvested and total protein lysates prepared for western analysis of UBF protein expression (actin protein levels demonstrate equal protein loading).
