# Supplementary material
Source: PubMed Central journal article supplement (PMC514509)
Supplement: 7600335s3.pdf [file 7600335s3.pdf]

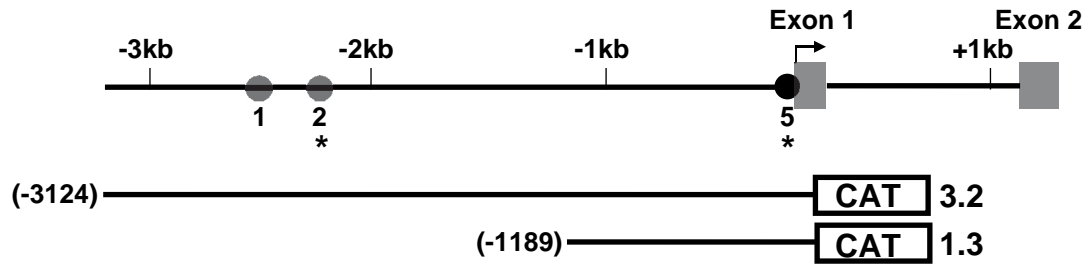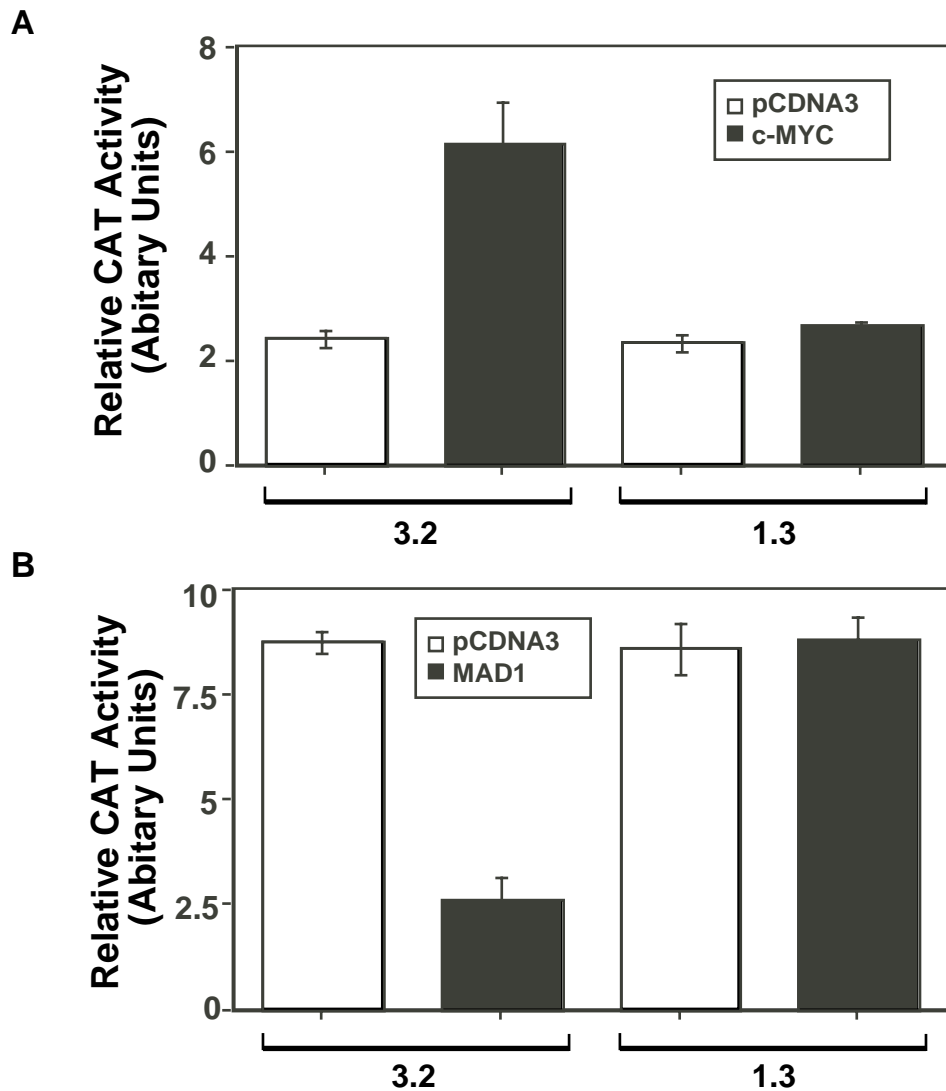

**Supplemental Figure 3:** c-MYC and MAD1 regulate transcription of a UBF reporter construct, dependent on distal E-boxes.

**(A):** Quiescent cultures of primary cardiomyocytes were transfected with UBF reporter gene constructs 3.2 or 1.3 and 2 $\mu$ g of either pCDNA3 or a c-MYC expression vector. After 24 h, cells were harvested and assayed for CAT activity. **(B):** Cultures of proliferating NIH3T3 fibroblasts were transfected with UBF reporter gene constructs 3.2 or 1.3 and 2 $\mu$ g of either pCDNA3 or a MAD1 expression vector. After 24 h, cells were harvested and assayed for CAT activity.
