# Supplementary material
Source: PubMed Central journal article supplement (PMC514509)
Supplement: 7600335s4.pdf [file 7600335s4.pdf]

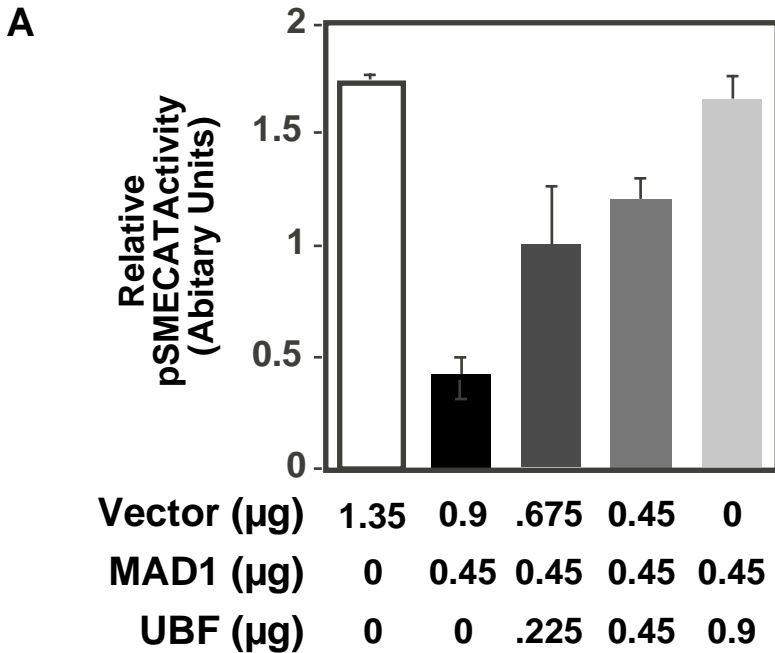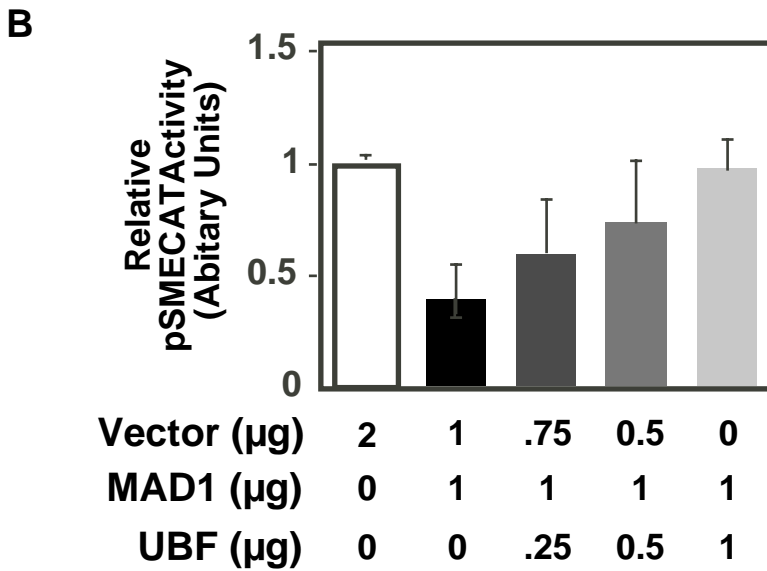

**Supplemental Figure 4:** Repression of rDNA transcription by MAD1 can be overcome by enforced expression of UBF.

(A): Exponentially growing cultures of NIH3T3 cells were transfected with a reporter construct for rDNA transcription pSMECAT, a constant amount of a MAD1 expression vector, and increasing amounts of a UBF expression vector as described. After 48 h, cells were harvested and assayed for CAT activity. (B): Cultures of primary neonatal cardiomyocytes were transfected with pSMECAT, a constant amount of a MAD1 expression vector, and increasing amounts of a UBF expression vector and stimulated with the hypertrophic agent endothelin-1. After 48 h, cells were harvested and assayed for CAT activity.
