# Supplementary material
Source: PubMed Central journal article supplement (PMC514509)
Supplement: 7600335s5.pdf [file 7600335s5.pdf]

**Supplemental Table 1: Primer sequences (5'-3') used for qPCR analysis in ChIP assays.**

| Primer | Sequence                  | Primer  | Sequence                  |
|--------|---------------------------|---------|---------------------------|
| UBF2-F | CCCACCTTGCTCGGTAAGTAAGC   | UCE-F   | AGTTGTTCCCTTTGAGGTCCGGT   |
| UBF2-R | GTCACCTCTGGGAGCCGGTTCA    | UCE-R   | AGGAAAGTGACAGGCCACAGAG    |
| UBF5-F | CACCCACTGATGAAGTCTATGAG   | ETS-F   | CCAAGTGTTTCATGCCACGTG     |
| UBF5-R | ACCCTTTTGAAGAGACACCAA     | ETS-R   | CGAGCGACTGCCACAAAAA       |
| UBF7-F | GGTTCCTCTCAGGCTTCGTTCT    | TERT-F  | CCTGGGTCCCTGGCTGTTTT      |
| UBF7-R | CCCCCATGTGACAGATGCTT      | TERT-R  | CCACGTGCGGGAACCA          |
| UBF8-F | GCCAATGCTTGTGAGACATCA     | lact1-F | CTGGGTGGCATTCTTTCTG       |
| UBF8-R | GACTTTCATTTGCATCTGGTAACCT | lact1-R | GCAGGGAGACGGAGTCA         |
| ENH-F  | AGGAGGCCGGGCAAGCA         | lact2-F | TCTAAGAAGTAGCACACCTGGTTGA |
| ENH-R  | CCTCCTTGTTAGAGACCGTCCTTAA | lact2-R | GAGGACAAGCCTGGCTTCTG      |

**Supplemental Table 2: Primer sequences used for qPCR analysis of 45S expression.**

| Primer                 | Sequence                             |
|------------------------|--------------------------------------|
| 45S-F                  | 5'-ACACGCTGTCCTTTCCCTATTAACACTAAA-3' |
| 45S-R                  | 5'-AGTAAAAAGAATAGGCTGGACAAGCAAAAC-3' |
| UBF cDNA-F             | 5'-CGCGCAGCATACAAAGAATACA-3'         |
| UBF cDNA-R             | 5'-GTTTGGGCCTCGGAGCTT-3'             |
| GAPDH-F                | 5'-GTATGACTCCACTCACGGCAA -3'         |
| GAPDH-R                | 5'-GGTCTCGCTCCTGGAAGATG-3'           |
| Beta-2-microglobulin-F | 5'-TTCACCCCCACTGAGACTGAT-3'          |
| Beta-2-microglobulin-R | 5'-GTCTTGGGCTCGGCCATA-3'             |

**Supplemental Table 3: Oligo RNA sequences used in RNA interference.**

| <b>Primer</b>     | <b>Sequence</b>             |
|-------------------|-----------------------------|
| sirUBF sense      | 5'-AAAGUUGCGUUUAAGGAUUTT-3' |
| sirUBF antisense  | 5-'AAUCCUAAAACGCAACUUUTT-3' |
| sirEGFR sense     | 5'-GCAGCACGACUUCUUCAAGTT-3' |
| sirEGFP antisense | 5-'CUUGAAGAAGUCGUGCUGCTT-3' |
